# Supplementary material for: Arabidopsis FLOWERING LOCUS D influences systemic-acquired-resistance-induced expression and histone modifications of WRKY genes
Source: Springer Nature journal article supplement (doi:10.1007/s12038-013-9407-7), 2014-02-07
Supplement: 12038_2013_9407_MOESM1_ESM.pdf [file 12038_2013_9407_MOESM1_ESM.pdf]

# *Arabidopsis* FLOWERING LOCUS D influences systemic-acquired-resistance-induced expression and histone modifications of WRKY genes

VIJAYATA SINGH, SHWETA ROY, DEEPIYOTI SINGH and ASHIS KUMAR NANDI

*J. Biosci.* 39(1), March 2014, 119–126, © Indian Academy of Sciences

## Supplementary material

**Supplementary table 1.** Primers used in this study

---

|              |                            |
|--------------|----------------------------|
| WRKY29 F     | GAAACTCATTAGCCGGTTCG       |
| WRKY29 R     | ATCAGCCGATGGGATCATAG       |
| WRKY6 F      | CAAACCGCTGAAGCTACGAT       |
| WRKY6 R      | ATCCCTTTGGCCATCTTCT        |
| WRKY53 F     | CTCCATCGGCAAACCTCTCAC      |
| WRKY53 R     | CCGAGCGTACAACCTATTCCG      |
| WRKY18 F     | TCAGCAACATGAGCAGAAAAA      |
| WRKY18 R     | GGTGCAAACGAGCATCTAAA       |
| WRKY65 F     | TTCGCATGGTTTACGGAGAT       |
| WRKY65 R     | TCTCCCATCGGAAAGAACAC       |
| WRKY38F      | CGAACGGTTTCTCCTTATCG       |
| WRKY38R      | GGAGGATAAGAGCCTGATGG       |
| WRKY29CHIP F | AAAAGGCTTGTTCTCGTCATATGTAC |
| WRKY29CHIP R | TGTTTCCTCTTTTATCTCTTTTGGTG |
| WRKY6CHIP F  | CGTGGACCGATTTTGTTTTTTC     |
| WRKY6CHIP R  | CAATGACGCAGGATCTGACGTA     |
| FLC Ace-F    | CTGCGACCATGATAGATACA       |
| FLC Ace-R    | GGCTTGAAACTTCACTCAAC       |
| FLC Met F    | GATCAAATGTCAAAAATGTGAG     |
| FLC Met R    | TCAGAAAGGAGTAGACATTACG     |
| ACT2 F       | ATGCCATCCTCCGTCTTGAC       |
| ACT2 R       | CGCTCTGCTGTTGTGGTGAA       |
| FLD-XcmIF    | AATGGTCTCATTCTCCGCACCAAAG  |
| FLD-XcmIR    | TCATTGTTCAATCTTTTTTCATC    |
|              | GTCTCACC                   |

---
